# Supplementary material for: Predicted structure and selectivity of 3d transition metal complexes with glutamicN,N-bis(carboxymethyl) acid
Source: Royal Society of Chemistry journal article supplement (doi:10.1039/d1nj03298d), 2021-01-01
Supplement: d1nj03298d1.pdf [file d1nj03298d1.pdf]

## Supporting Information

### Predicted structure and selectivity of glutamic n, n-bis(carboxymethyl acid complexes

Fatima Mechachti<sup>1</sup>, Salima Lakehal<sup>1,2</sup>, Aicha Lakehal<sup>3</sup>, Christophe Morell<sup>4</sup>, Lynda Merzoud<sup>4</sup>, Henry Chermette<sup>4</sup>

<sup>1</sup>Laboratoire de Chimie des Matériaux et des Vivants: Activité & Réactivité, Université Batna1, Batna, Algérie

<sup>2</sup>Institut des sciences de la terre et de l'univers, Université de Batna2, Batna, Algérie

<sup>3</sup>Faculté des sciences techniques, Université de Batna2, Batna, Algérie

<sup>4</sup>Université de Lyon, CNRS, Université Claude Bernard Lyon 1, ENS-Lyon, Institut des Sciences Analytiques, UMR CNRS 5280, 69622 Villeurbanne Cedex, France

**Table S1.** Selected geometrical parameters of GLDA complexes (B structure)

| Metal ions       |         | Bond length (Å) |      |                   |                   |                   |                   |                   | dihedral angle | E(kcal)   |
|------------------|---------|-----------------|------|-------------------|-------------------|-------------------|-------------------|-------------------|----------------|-----------|
|                  |         | Spin            | M-N  | M-O <sub>17</sub> | M-O <sub>12</sub> | M-O <sub>14</sub> | M-O <sub>16</sub> | M-O <sub>29</sub> |                |           |
| Mn <sup>2+</sup> | Solvent | HS              | 2.27 | 2.21              | 2.14              | 2.21              | 2.08              | 2.30              | 22.5           | - 4839.84 |
|                  |         | LS              | 2.29 | 2.21              | 2.15              | 2.21              | 2.09              | 2.29              | 12.1           | -4303.88  |
| Fe <sup>2+</sup> | solvent | HS              | 2.21 | 2.11              | 2.13              | 2.09              | 2.12              | 2.24              | 22.9           | -4818.83  |
| Co <sup>2+</sup> | solvent | HS              | 2.11 | 2.12              | 2.08              | 2.13              | 2.02              | 2.22              | 20.1           | - 4783.13 |
| Ni <sup>2+</sup> | solvent |                 | 2.03 | 2.08              | 2.04              | 2.09              | 2.06              | 2.17              | 15.7           | - 4727.28 |
| Zn <sup>2+</sup> | solvent |                 | 2.14 | 2.15              | 2.10              | 2.17              | 2.05              | 2.19              | 20.3           | - 4654.01 |

**Table S2:** Selected geometrical parameters of GLDA complexes (A structure)

| Metal ions             |         | Bond length (Å) |      |                   |                   |                   |                   | dihedral angle | E(kcal/mol) |
|------------------------|---------|-----------------|------|-------------------|-------------------|-------------------|-------------------|----------------|-------------|
|                        |         | Spin            | M-N  | M-O <sub>17</sub> | M-O <sub>12</sub> | M-O <sub>14</sub> | M-O <sub>16</sub> |                |             |
| <b>Mn<sup>2+</sup></b> | gas     | H-S             | 2.23 | 2.28              | 2.06              | 2.18              | 2.01              | 37.0           | -4331.34    |
|                        |         | L-S             | 2.00 | 2.03              | 2.02              | 1.99              | 1.92              | 25.1           | -4297.43    |
|                        | solvent | H-S             | 2.22 | 2.22              | 2.07              | 2.20              | 2.03              | 26.6           | -4503.29    |
| <b>Fe<sup>2+</sup></b> | gas     | H-S             | 2.19 | 2.18              | 2.08              | 2.08              | 1.98              | 33.4           | -4301.01    |
|                        |         | L-S             | 1.90 | 1.99              | 1.95              | 1.98              | 1.93              | 14.7           | -4284.17    |
|                        | solvent | H-S             | 2.17 | 2.12              | 2.08              | 2.08              | 1.98              | 28.4           | -4473.42    |
|                        |         | L-S             | 1.90 | 1.97              | 1.94              | 1.97              | 1.92              | 13.4           | -4460.66    |
| <b>Co<sup>2+</sup></b> | gas     | H-S             | 2.10 | 2.17              | 2.01              | 2.09              | 1.97              | 35.0           | -4274.47    |
|                        |         | L-S             | 2.07 | 1.96              | 1.93              | 1.96              | 1.92              | 14.0           | -4272.86    |
|                        | solvent | H-S             | 2.07 | 2.13              | 2.01              | 2.09              | 1.95              | 23.4           | -4446.16    |
|                        |         | L-S             | 2.06 | 1.93              | 1.93              | 1.94              | 1.91              | 13.7           | -4447.09    |
| <b>Ni<sup>2+</sup></b> | gas     |                 | 2.03 | 2.15              | 2.01              | 2.08              | 1.95              | 28.4           | -4214.55    |
|                        | solvent |                 | 2.00 | 2.08              | 2.00              | 2.08              | 1.96              | 20.0           | -4388.50    |
| <b>Cu<sup>2+</sup></b> | gas     |                 | 2.23 | 2.07              | 2.01              | 2.03              | 1.95              | 30.2           | -4162.18    |
|                        | solvent |                 | 2.17 | 2.02              | 1.99              | 2.03              | 1.95              | 22.2           | -4333.75    |
| <b>Zn<sup>2+</sup></b> | gas     |                 | 2.11 | 2.34              | 2.00              | 2.15              | 1.93              | 41.6           | -4145.21    |
|                        | solvent |                 | 2.09 | 2.21              | 2.00              | 2.17              | 1.95              | 31.6           | -4316.91    |

**Table S3:** Topological data for the BCPs of coordination bonds in the GLDA-*M* complexes (*B* structure) when (*M*= Mn, Fe, Co, Ni, Cu and Zn)

| Complexes                         | PC                               | $\rho(r)$ | $\nabla^2 \rho(r)$ | $ V /G$ | $H(r)$  |
|-----------------------------------|----------------------------------|-----------|--------------------|---------|---------|
| <b>GLDA-Mn</b>                    | Mn-O <sub>16</sub>               | 0.065     | 0.3137             | 1.0983  | -0.0085 |
|                                   | Mn-O <sub>14</sub>               | 0.051     | 0.2210             | 1.0849  | -0.0051 |
|                                   | Mn-O <sub>12</sub>               | 0.060     | 0.2705             | 1.0977  | -0.0073 |
|                                   | Mn-O <sub>17</sub>               | 0.051     | 0.2214             | 1.0852  | -0.0052 |
|                                   | Mn-N                             | 0.054     | 0.1911             | 1.1628  | -0.0093 |
|                                   | Mn-O <sub>29</sub>               | 0.041     | 0.1781             | 1.0502  | -0.0024 |
|                                   | H <sub>27</sub> -H <sub>20</sub> | 0.016     | 0.0560             | 0.8737  | 0.0016  |
| <b>GLDA-Fe</b>                    | Fe-O <sub>16</sub>               | 0.059     | 0.4255             | 1.0486  | -0.0054 |
|                                   | Fe-O <sub>14</sub>               | 0.065     | 0.4161             | 1.0799  | -0.0090 |
|                                   | Fe-O <sub>12</sub>               | 0.059     | 0.5226             | 1.0483  | -0.0066 |
|                                   | Fe-O <sub>17</sub>               | 0.063     | 0.418              | 1.0827  | -0.0094 |
|                                   | Fe-O <sub>29</sub>               | 0.043     | 0.3444             | 1.0171  | -0.0015 |
|                                   | Fe-N                             | 0.059     | 0.531              | 1.1299  | -0.0198 |
|                                   | H <sub>20</sub> -H <sub>27</sub> | 0.017     | 0.0385             | 0.7863  | 0.0017  |
| <b>GLDA-Co</b>                    | Co-O <sub>16</sub>               | 0.070     | 0.3100             | 1.0746  | -0.0062 |
|                                   | Co-O <sub>14</sub>               | 0.059     | 0.2911             | 1.1073  | -0.0087 |
|                                   | Co-O <sub>12</sub>               | 0.064     | 0.3521             | 1.1062  | -0.0105 |
|                                   | Co-O <sub>17</sub>               | 0.060     | 0.2940             | 1.1048  | -0.0086 |
|                                   | Co-O <sub>29</sub>               | 0.044     | 0.2147             | 1.0518  | -0.0029 |
|                                   | Co-N                             | 0.071     | 0.3114             | 1.1667  | -0.0156 |
|                                   | C-H <sub>27</sub>                | 0.006     | 0.1051             | 0.9064  | 0.0022  |
| H <sub>27</sub> -H <sub>20</sub>  | 0.015                            | 0.0576    | 0.8945             | 0.0014  |         |
| <b>GLDA-Ni</b>                    | Ni-O <sub>16</sub>               | 0.061     | 0.3287             | 1.0765  | -0.0068 |
|                                   | Ni-O <sub>14</sub>               | 0.062     | 0.3037             | 1.0989  | -0.0083 |
|                                   | Ni-O <sub>12</sub>               | 0.068     | 0.3532             | 1.1021  | -0.0100 |
|                                   | Ni-O <sub>17</sub>               | 0.062     | 0.3079             | 1.0998  | -0.0085 |
|                                   | Ni-N                             | 0.084     | 0.3494             | 1.1889  | -0.0203 |
|                                   | H <sub>27</sub> -H <sub>20</sub> | 0.017     | 0.0559             | 0.8772  | 0.0015  |
|                                   | Ni-O <sub>29</sub>               | 0.048     | 0.2455             | 1.0606  | -0.0040 |
| HO <sub>19</sub> -O <sub>16</sub> | 0.023                            | 0.0977    | 0.8874             | 0.0025  |         |
| <b>GLDA-Zn</b>                    | Zn-O <sub>16</sub>               | 0.064     | 0.3132             | 1.1081  | -0.0095 |
|                                   | Zn-O <sub>14</sub>               | 0.052     | 0.2568             | 1.1011  | -0.0072 |
|                                   | Zn-O <sub>12</sub>               | 0.061     | 0.2515             | 1.1010  | -0.0071 |
|                                   | Zn-O <sub>17</sub>               | 0.064     | 0.2073             | 1.0928  | -0.0053 |
|                                   | Zn-N                             | 0.065     | 0.2308             | 1.1775  | -0.0125 |
|                                   | Zn-O <sub>29</sub>               | 0.047     | 0.1759             | 1.0605  | -0.0028 |
|                                   | H <sub>20</sub> -H <sub>27</sub> | 0.016     | 0.0385             | 0.7863  | 0.0017  |

**Table S4:** Topological data for the BCPs of coordination bonds in the GLDA-*M* complexes (*A* structure) when (*M*= Mn, Fe, Co, Ni, Cu and Zn)

| Complexes      | BCP                              | $\rho(r)$ | $\nabla^2 \rho(r)$ | $ V /G$ | $H(r)$  |
|----------------|----------------------------------|-----------|--------------------|---------|---------|
| <b>GLDA-Mn</b> | Mn-O <sub>16</sub>               | 0.075     | 0.3750             | 1.1202  | -0.0128 |
|                | Mn-O <sub>14</sub>               | 0.052     | 0.2115             | 1.0866  | -0.0050 |
|                | Mn-O <sub>12</sub>               | 0.070     | 0.3446             | 1.1205  | -0.0118 |
|                | Mn-O <sub>17</sub>               | 0.050     | 0.1938             | 1.0905  | -0.0048 |
|                | Mn-N                             | 0.060     | 0.2002             | 1.1642  | -0.0098 |
|                | H <sub>27</sub> -H <sub>20</sub> | 0.016     | 0.0378             | 0.8043  | 0.0015  |
| <b>GLDA-Fe</b> | Fe-O <sub>16</sub>               | 0.085     | 0.4831             | 1.0740  | -0.0097 |
|                | Fe-O <sub>14</sub>               | 0.067     | 0.4330             | 1.0778  | -0.0091 |
|                | Fe-O <sub>12</sub>               | 0.066     | 0.5376             | 1.0463  | -0.0065 |
|                | Fe-O <sub>17</sub>               | 0.061     | 0.4358             | 1.0803  | -0.0095 |
|                | Fe-N                             | 0.065     | 0.5518             | 1.1512  | -0.0246 |
|                | H <sub>20</sub> -H <sub>27</sub> | 0.017     | 0.0573             | 0.8834  | 0.0015  |
| <b>GLDA-Co</b> | Co-O <sub>16</sub>               | 0.087     | 0.4977             | 1.1175  | -0.0166 |
|                | Co-O <sub>14</sub>               | 0.064     | 0.4523             | 1.1075  | -0.0136 |
|                | Co-O <sub>12</sub>               | 0.075     | 0.4702             | 1.0934  | -0.0121 |
|                | Co-O <sub>17</sub>               | 0.058     | 0.4439             | 1.1119  | -0.0140 |
|                | Co-N                             | 0.077     | 0.3127             | 1.1619  | -0.0151 |
|                | H <sub>27</sub> -H <sub>20</sub> | 0.016     | 0.0434             | 0.8213  | 0.0016  |
| <b>GLDA-Ni</b> | Ni-O <sub>16</sub>               | 0.081     | 0.5216             | 1.1293  | -0.0194 |
|                | Ni-O <sub>14</sub>               | 0.064     | 0.4817             | 1.1370  | -0.0191 |
|                | Ni-O <sub>12</sub>               | 0.075     | 0.4918             | 1.1297  | -0.0183 |
|                | Ni-O <sub>17</sub>               | 0.063     | 0.4729             | 1.1441  | -0.0199 |
|                | Ni-N                             | 0.089     | 0.1413             | 1.1394  | -0.0057 |
|                | H <sub>27</sub> -H <sub>20</sub> | 0.018     | 0.5216             | 1.1293  | -0.0194 |
| <b>GLDA-Cu</b> | Cu-O <sub>16</sub>               | 0.083     | 0.4099             | 1.1444  | -0.0173 |
|                | Cu-O <sub>14</sub>               | 0.071     | 0.3112             | 1.1219  | -0.0108 |
|                | Cu-O <sub>12</sub>               | 0.078     | 0.3637             | 1.1369  | -0.0144 |
|                | Cu-O <sub>17</sub>               | 0.073     | 0.0687             | 1.1259  | -0.0108 |
|                | Cu-N                             | 0.062     | 0.2094             | 1.1456  | -0.0089 |
|                | H <sub>27</sub> -H <sub>20</sub> | 0.017     | 0.0401             | 0.7969  | -0.0017 |
| <b>GLDA-Zn</b> | Zn-O <sub>16</sub>               | 0.084     | 0.4190             | 1.1417  | -0.0173 |
|                | Zn-O <sub>14</sub>               | 0.052     | 0.2015             | 1.0879  | -0.0049 |
|                | Zn-O <sub>12</sub>               | 0.077     | 0.3718             | 1.1361  | -0.0146 |
|                | Zn-O <sub>17</sub>               | 0.048     | 0.1638             | 1.0832  | -0.0037 |
|                | Zn-N                             | 0.074     | 0.2552             | 1.1798  | -0.0140 |
|                | H <sub>27</sub> -H <sub>20</sub> | 0.017     | 0.0549             | 0.8682  | 0.0016  |

**Table S5:** RCPs electronic densities GLDA-M complexes where (M= Mn, Co, Fe, Ni, Cu and Zn)

|                  | B      |        |        |        | A      |        |        |        |
|------------------|--------|--------|--------|--------|--------|--------|--------|--------|
|                  | Ring1  | Ring2  | Ring3  | Ring4  | Ring1  | Ring2  | Ring3  | Ring4  |
| Mn <sup>2+</sup> | 0.0062 | 0.0208 | 0.0189 | 0.0218 | 0.0065 | 0.0215 | 0.0201 | 0.0225 |
| Fe <sup>2+</sup> | 0.0078 | 0.0225 | 0.0209 | 0.0235 | 0.0097 | 0.0233 | 0.0222 | 0.0243 |
| Co <sup>2+</sup> | 0.0072 | 0.0239 | 0.0222 | 0.0241 | 0.0081 | 0.0241 | 0.0239 | 0.0248 |
| Ni <sup>2+</sup> | 0.0071 | 0.0243 | 0.0238 | 0.0251 | 0.0079 | 0.0247 | 0.0248 | 0.0258 |
| Cu <sup>2+</sup> |        |        |        |        | 0.0072 | 0.0224 | 0.0220 | 0.0234 |
| Zn <sup>2+</sup> | 0.0064 | 0.0219 | 0.0207 | 0.0226 | 0.0075 | 0.0223 | 0.0227 | 0.0231 |

Ring1 :7-member cycle (Metal-Oxygen16-four carbon-Nitrogen),

Ring2 : 5-member cycle (Metal-Oxygen14-two carbon-Nitrogen)

Ring3 : 5-member cycle (Metal-Oxygen12-two carbon-Nitrogen)

Ring4 : 5-member cycle (Metal-Oxygen17-two carbon-Nitrogen)

**Table S6:** Selected geometrical parameters of hydrated ions in octahedral geometry

|    | Ionic radius [48] | M-O equatorial | M-O axial | Exp <sup>a</sup> |
|----|-------------------|----------------|-----------|------------------|
| Mn | 0.830             | 2.205          | 2.206     | 2.175            |
| Fe | 0.780             | 2.144          | 2.161     | 2.126            |
| Co | 0.745             | 2.117          | 2.109     | 2.092            |
| Ni | 0.690             | 2.086          | 2.087     | 2.056            |
| Cu | 0.730             | 2.038          | 2.350     | 1.97 and 2.3     |
| Zn | 0.740             | 2.123          | 2.123     | 2.092            |

<sup>a</sup>Ralf Akesson, Lars G. M. Pettersson, Magnus Sandstrom, and Ulf Wahlgred « Ligand Field Effects in the Hydrated Divalent and Trivalent Metal Ions of the First and Second Transition Periods » *J. Am. Chem.Soc.* 116 (1994) 8691-8704.

**Table S7:** Energies and free energy of the 4 HGLDA<sup>3-</sup> isomers (kcal/mol)

|                          | Free energy |          | E        |          |
|--------------------------|-------------|----------|----------|----------|
|                          | gas         | solvent  | gas      | solvent  |
| O16(HGLDA) <sup>3-</sup> | -3979.13    | -4343.33 | -4065.97 | -4433.63 |
| O12(HGLDA) <sup>3-</sup> | -3990.43    | -4342.85 | -4076.64 | -4433.05 |
| O14(HGLDA) <sup>3-</sup> | -3997.95    | -4343.59 | -4084.41 | -4433.85 |
| O17(HGLDA) <sup>3-</sup> | -4001.23    | -4341.81 | -4089.80 | -4432.98 |
| (GLDA) <sup>4-</sup>     | -3762.62    | -4347.38 | -3842.51 | -4431.28 |
| N(HGLDA) <sup>3-</sup>   | -4021.98    | -4360.98 | -4110.56 | -4451.94 |

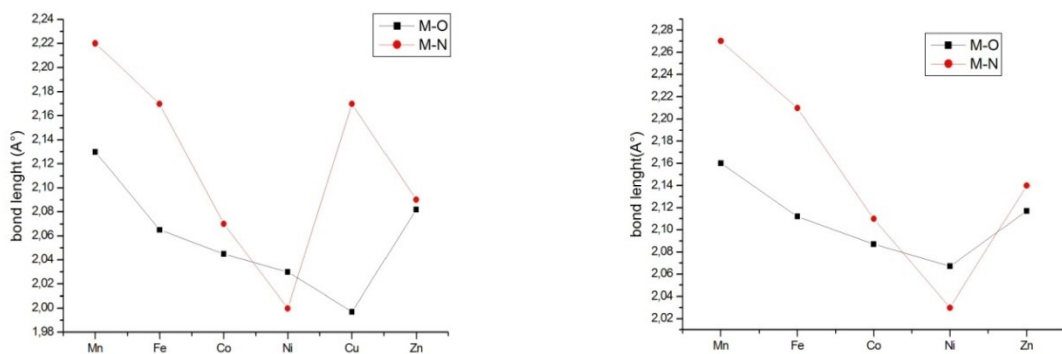

**Fig. S1:** Dependence of M-O and M-N bond length with the late first-row transition series divalent metal ions for A and B structures, respectively. Both graphs agree with the Irving-Williams series.

1

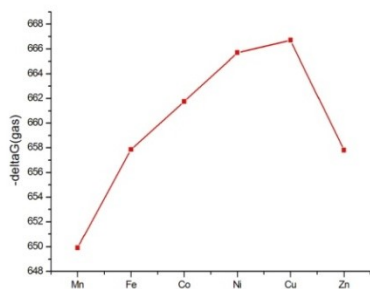

2

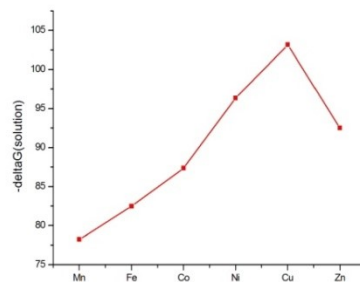

3

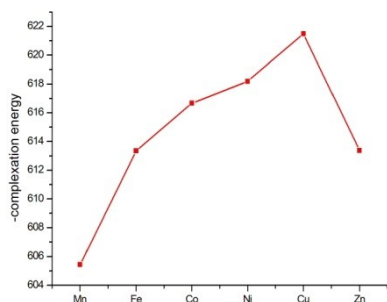

4

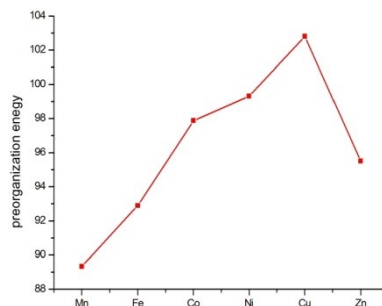

5

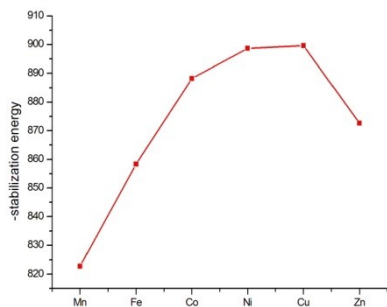

6

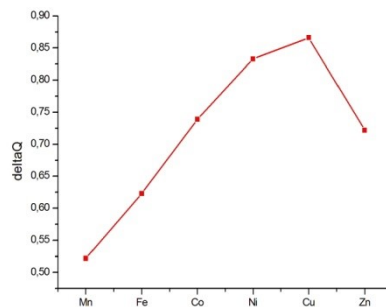

**Fig. S2:** Dependence of DFT calculated 1,2 free energy both in gas phase and solution respectively, 3 complexation energy, 4 preorganization energy, 5 stabilization energy and 6 GLDA-metal charge transfer  $\Delta Q$  on the atomic number of the late first-row transition series divalent metal ions for pentadentate complexes. All the graphs agree with the Irving-Williams series.

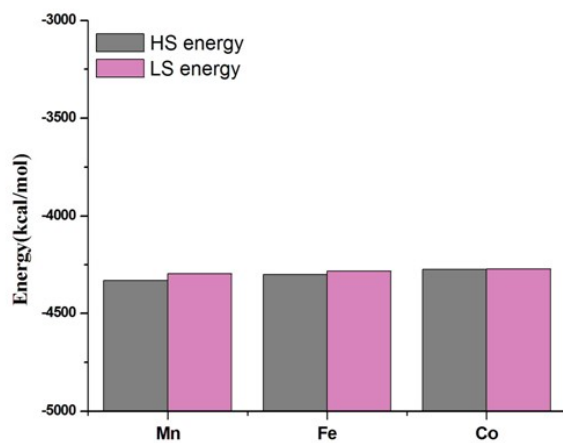

**Fig. S3:** Stability of HS complexes compared to LS ones (A structure)



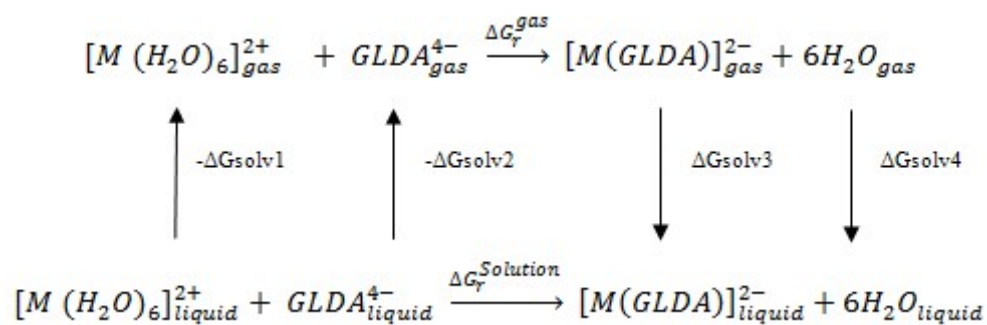

*Fig. S4: The thermodynamic cycle used for the complexation of the metal ion*

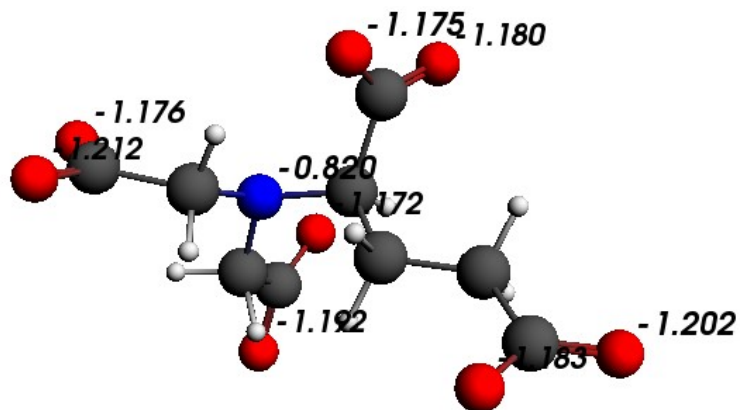

*Fig. S5: GLDA<sup>+</sup> Bader charges*

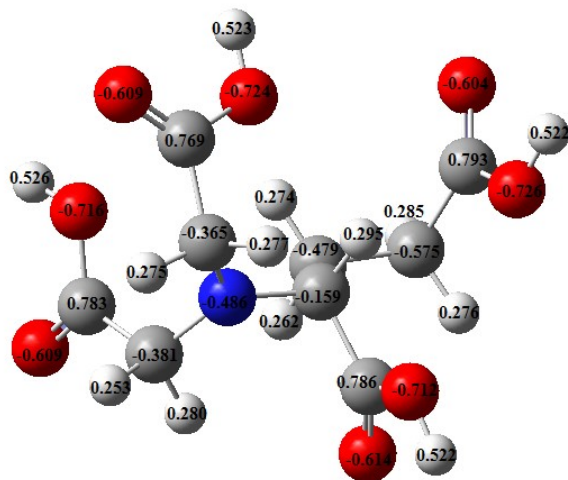

**Fig. S6:**  $GLDA^+$  NPA numerical charges

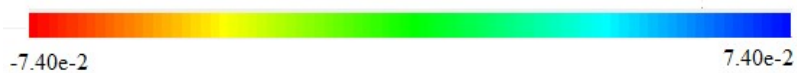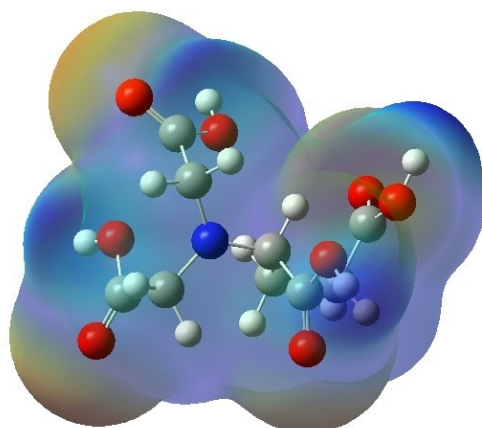

**Fig. S7:**  $GLDA^+$  MEPS. The largest negative values are depicted in red, the lowest in blue.

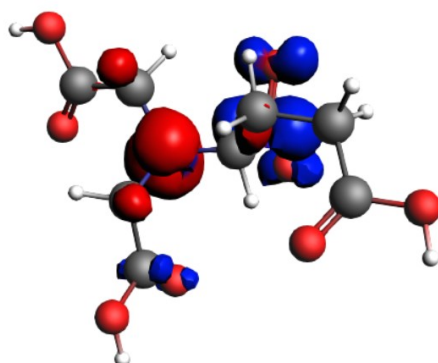

**Fig. S8:**  $GLDA^+$  Dual descriptors with Negative regions are colored red and positive regions are colored blue.

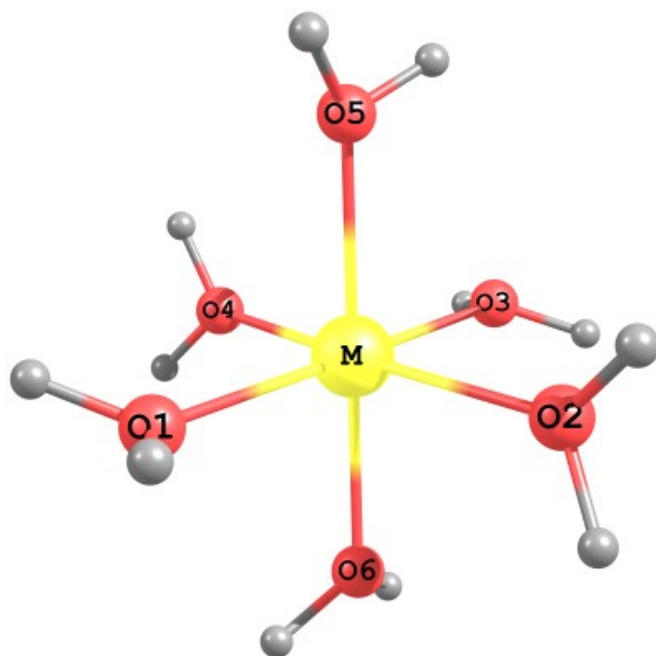

*Fig. S9: Optimized octahedral geometry of hydrated ions with  $M = \text{Mn, Fe, Co, Ni, Cu}$  and  $\text{Zn}$*

|                                                                      |                                                                                                                                                                             |                                                                                                                                                     |
|----------------------------------------------------------------------|-----------------------------------------------------------------------------------------------------------------------------------------------------------------------------|-----------------------------------------------------------------------------------------------------------------------------------------------------|
| Co                                                                   | 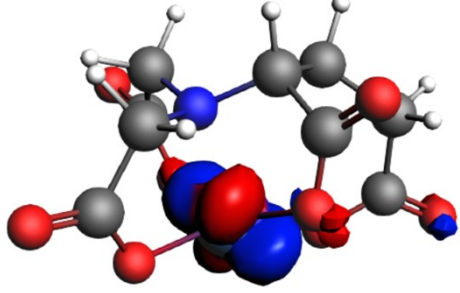 <p>HOMO 57<math>\beta</math> 33.4% <math>d_{yz}</math> 23.9% <math>d_{x^2-y^2}</math></p> |  <p>HOMO-1 44.3% <math>d_{xy}</math> 35% <math>d_{z^2}</math></p> |
| Fe                                                                   |  <p>HOMO 56<math>\beta</math> 41.5% <math>d_{z^2}</math></p>                               |  <p>HOMO-1 60<math>\alpha</math> 28.6% <math>d_{xy}</math></p>    |
| Mn                                                                   |  <p>HOMO 58<math>\alpha</math> 41.8% <math>d_{x^2-y^2}</math></p>                         |  <p>HOMO-1 57<math>\alpha</math> 44.4% <math>d_{z^2}</math></p>  |
| <p><i>Fig. S10: occupancy of HOMO and HOMO-1 of HS complexes</i></p> |                                                                                                                                                                             |                                                                                                                                                     |
